# Supplementary material
Source: publisher site journal article supplement (https://www.dovepress.com/article/431503)
Supplement: Supplementary file 1 [file get_supplementary_file.php]

**Supplementary table 1.** Comparison of baseline characteristics and imaging features of patients between two cohorts

| Variable                                   | LMU hospital<br>(n=108) | Muenster<br>hospital (n=70) | p value          |
|--------------------------------------------|-------------------------|-----------------------------|------------------|
| <b>Clinical and laboratory factors</b>     |                         |                             |                  |
| Sex                                        |                         |                             | 0.835            |
| • Female                                   | 22 (20.4%)              | 16 (22.9%)                  |                  |
| • Male                                     | 86 (79.6%)              | 54 (77.1%)                  |                  |
| Age at liver transplantation, median (IQR) | 58.0 (9.0)              | 60.5 (11.5)                 | <b>0.024</b>     |
| Listing to transplant (days), median (IQR) | 176.0 (170.3)           | 127.5 (242.8)               | 0.227            |
| Etiology of liver disease                  |                         |                             | <b>&lt;0.001</b> |
| • Chronic alcoholism                       | 29 (26.9%)              | 23 (32.9%)                  |                  |
| • HBV                                      | 8 (7.4%)                | 17 (24.3%)                  |                  |
| • HCV                                      | 40 (37.0%)              | 13 (18.6%)                  |                  |
| • HBV + HCV                                | 6 (5.6%)                | 0 (0.0%)                    |                  |
| • Cryptogenic                              | 9 (8.3%)                | 3 (4.3%)                    |                  |
| • NASH                                     | 3 (2.8%)                | 8 (11.4%)                   |                  |
| • Others                                   | 13 (12.0%)              | 6 (8.5%)                    |                  |
| INR, median (IQR)                          | 1.3 (0.4)               | 1.2 (0.3)                   | <b>0.003</b>     |
| MELD score, median (IQR)                   | 11.5 (8.0)              | 9.5 (5.8)                   | <b>&lt;0.001</b> |
| Bilirubin (mg/dl), median (IQR)            | 1.8 (1.5)               | 1.0 (1.4)                   | <b>&lt;0.001</b> |
| ALT (U/L), median (IQR)                    | 39.5 (57.8)             | 41.5 (29.3)                 | 0.770            |
| AST (U/L), median (IQR)                    | 65.0 (71.0)             | 58.0 (44.0)                 | 0.161            |
| ALP (U/L), median (IQR)                    | 144.5 (89.5)            | 153.5 (78.5)                | 0.877            |
| GGT (U/L), median (IQR)                    | 102.5 (143.0)           | 115 (144.3)                 | 0.285            |
| AFP (ng/mL), median (IQR)                  | 7.2 (22.6)              | 8.3 (60.3)                  | 0.719            |
| <b>Imaging factors</b>                     |                         |                             |                  |
| Liver cirrhosis                            | 94 (87.0%)              | 59 (84.3%)                  | 0.768            |
| Biliary dilatation                         | 9 (8.3%)                | 12 (17.1%)                  | 0.123            |
| Varices                                    | 75 (69.4%)              | 33 (47.1%)                  | <b>0.005</b>     |
| Ascites                                    | 42 (38.9%)              | 28 (40.0%)                  | 1.000            |

|                                                   |             |             |                  |
|---------------------------------------------------|-------------|-------------|------------------|
| Pleural effusion                                  | 6 (5.6%)    | 5 (7.1%)    | 0.754            |
| Small lesions                                     | 32 (29.6%)  | 30 (42.9%)  | 0.100            |
| Diameter of the largest lesion (mm), median (IQR) | 29.3 (13.2) | 37.2 (24.6) | <b>&lt;0.001</b> |
| Number of tumors > 3                              | 4 (3.7%)    | 13 (18.6%)  | <b>0.001</b>     |
| Atypical HCC enhancement pattern                  | 10 (9.3%)   | 1 (1.4%)    | 0.052            |
| Capsule                                           | 17 (15.7%)  | 12 (17.1%)  | 0.968            |
| Irregular margin                                  | 61 (56.5%)  | 40 (57.1%)  | 1.000            |
| Satellite nodules                                 | 7 (6.5%)    | 8 (11.4%)   | 0.377            |
| Peritumoral enhancement                           | 7 (6.5%)    | 14 (20.0%)  | <b>0.013</b>     |
| Nodule-in-nodule                                  | 16 (14.8%)  | 18 (25.7%)  | 0.107            |
| HU of tumor on arterial phase, mean (SD)          | 81.8 (20.8) | 89.4 (20.5) | <b>0.017</b>     |
| HU of tumor on portal phase, mean (SD)            | 93.3 (18.6) | 93.3 (21.0) | 0.999            |
| History of bridging therapies                     | 97 (89.8%)  | 38 (54.3%)  | <b>&lt;0.001</b> |
| <b>Follow-up</b>                                  |             |             |                  |
| Recurrence                                        | 12 (11.1%)  | 19 (27.1%)  | <b>0.011</b>     |

Bold indicates statistical significance.

AFP: Alpha fetoprotein, ALP: Alkanine phosphatase, ALT: Alanine transaminase, AST: Aspartate transaminase, GGT: Gamma-glutamyl transferase, HBV: Hepatitis B, HCC: Hepatocellular carcinoma, HCV: Hepatitis C, HU: Hounsfield Unit, INR: International normalized ratio, IQR: Interquartile range, MELD: Model for End-Stage Liver Disease, NASH: Non-alcoholic steatohepatitis

## Supplementary table 2. Interreader agreement

| Imaging features                 | Cohen's kappa |
|----------------------------------|---------------|
| Atypical HCC enhancement pattern | 0.442         |
| Biliary dilatation               | 0.524         |
| Varices                          | 0.515         |
| Ascites                          | 0.713         |
| Pleural effusion                 | 0.767         |
| Capsule                          | 0.584         |
| Margin                           | 0.405         |
| Satellite nodules                | 0.518         |
| Peritumoral enhancement          | 0.614         |
| Nodule_in_nodule                 | 0.457         |
| Liver morphology                 | 0.461         |
| Small lesions                    | 0.664         |

| Imaging features              | Intraclass correlation coefficient (ICC) |
|-------------------------------|------------------------------------------|
| Diameter of the largest tumor | 0.811                                    |
| Number of lesions             | 0.918                                    |
| HU on arterial phase          | 0.814                                    |
| HU on portal phase            | 0.882                                    |

**Supplementary table 3. Coefficient weights of variables for time-to-recurrence analysis**

| Parameter                        | Coefficient | Exponentiated<br>LASSO coefficient |
|----------------------------------|-------------|------------------------------------|
| Peritumoral enhancement          | 1.4194522   | 4.1348549                          |
| Number of tumors                 | 1.0832207   | 2.9541787                          |
| AFP                              | 0.6552335   | 1.9255921                          |
| Diameter of largest tumor        | 0.6208740   | 1.8605534                          |
| Capsule                          | 0.0372473   | 1.0379497                          |
| Atypical HCC enhancement pattern | 0           | 1                                  |
| Biliary dilatation               | 0           | 1                                  |
| Varices                          | 0           | 1                                  |
| Ascites                          | 0           | 1                                  |
| Pleural effusion                 | 0           | 1                                  |
| Irregular margin                 | 0           | 1                                  |
| Satellite nodules                | 0           | 1                                  |
| Nodule-of-nodule                 | 0           | 1                                  |
| Liver cirrhosis                  | 0           | 1                                  |
| Small lesions                    | 0           | 1                                  |
| Sex                              | 0           | 1                                  |
| Listing to transplant            | 0           | 1                                  |
| Age at liver transplantation     | 0           | 1                                  |
| HU of tumor on arterial phase    | 0           | 1                                  |
| HU of tumor on portal phase      | 0           | 1                                  |
| History of bridging therapies    | -1.0787777  | 0.3400109                          |

AFP: Alpha fetoprotein, HCC: Hepatocellular carcinoma, HU: Hounsfield Unit.
